# Supplementary material for: Hypermethylation and down-regulation of DLEU2 in paediatric acute myeloid leukaemia independent of embedded tumour suppressor miR-15a/16-1
Source: PubMed Central journal article supplement (PMC4050407; doi:10.1186/1476-4598-13-123), 2014-05-24
Supplement: 1476-4598-13-123-S10.pdf [file 1476-4598-13-123-S10.pdf]

**Additional File 10: Top Gene Ontology terms using GOrilla gene ontology identification tool**

The top 500 target genes for each differentially expressed *miR-15a/16-1* microRNA cluster member in paediatric AML were used for GOrilla gene ontology pathway analysis

| miRNA                | GO Term    | Description                                                                          | P-Value  | Enrichment | Gene Example                      |
|----------------------|------------|--------------------------------------------------------------------------------------|----------|------------|-----------------------------------|
| <b>hsa-miR-16-1*</b> | GO:0006396 | RNA processing                                                                       | 7.95E-07 | 3.48       | EMG1, RPP30, HNRNPR, CHERP, SRRM1 |
|                      | GO:0000375 | RNA splicing, via transesterification reactions                                      | 1.98E-05 | 4.57       | SMNDC1, TXNL4A, HNRNPA0, SRSF10   |
|                      | GO:0008380 | RNA splicing                                                                         | 5.02E-05 | 3.81       | PPARGC1A, NUDT21, MBNL2           |
|                      | GO:0006397 | mRNA processing                                                                      | 5.12E-05 | 3.43       | CELF2, APOBEC2, SLU7              |
|                      | GO:0000377 | RNA splicing, via transesterification reactions with bulged adenosine as nucleophile | 7.64E-05 | 4.57       | SRRM1, NUDT21, TXNL4A             |
|                      | GO:0000398 | mRNA splicing, via spliceosome                                                       | 7.64E-05 | 4.57       | SLU7, HNRNPR, HNRNPA0             |
|                      | GO:2001244 | positive regulation of intrinsic apoptotic signaling pathway                         | 4.29E-04 | 63.29      | BCL2L11, DNMT1L                   |
|                      | GO:2001242 | regulation of intrinsic apoptotic signaling pathway                                  | 4.29E-04 | 63.29      | BCL2L11, DNMT1L                   |
| <b>hsa-miR-15a</b>   | GO:0072384 | organelle transport along microtubule                                                | 2.50E-04 | 23.52      | DYNC1I1, MAP2K1, KIF1B            |
|                      | GO:0007017 | microtubule-based process                                                            | 3.37E-04 | 10.45      | EYA1, DYNC1I1, MAP7               |
|                      | GO:0035239 | tube morphogenesis                                                                   | 6.73E-04 | 17.33      | LRP6, EYA1, DLL1                  |
|                      | GO:0010970 | microtubule-based transport                                                          | 7.09E-04 | 18.81      | DYNC1I1, MAP2K1, KIF1B            |
|                      | GO:0030705 | cytoskeleton-dependent intracellular transport                                       | 7.09E-04 | 18.81      | DYNC1I1, MAP2K1, KIF1B            |
|                      | GO:0051656 | establishment of organelle localization                                              | 7.09E-04 | 18.81      | EYA1, MAP2K1, KIF1B               |
|                      | GO:0030155 | regulation of cell adhesion                                                          | 8.86E-04 | 10.98      | ARL2, SMAD7, MAP2K1, DLL1         |
| <b>hsa-miR-15a*</b>  | GO:2001242 | regulation of intrinsic apoptotic signaling pathway                                  | 1.92E-04 | 91.4       | BCL2L11, PPIF                     |
|                      | GO:0090200 | positive regulation of release of cytochrome c from mitochondria                     | 1.92E-04 | 91.4       | BCL2L11, PPIF                     |
|                      | GO:0010822 | positive regulation of mitochondrion organization                                    | 4.46E-04 | 60.93      | BCL2L11, PPIF                     |
|                      | GO:0090199 | regulation of release of cytochrome c from mitochondria                              | 4.46E-04 | 60.93      | BCL2L11, PPIF                     |
