# Supplementary material for: Hypermethylation and down-regulation of DLEU2 in paediatric acute myeloid leukaemia independent of embedded tumour suppressor miR-15a/16-1
Source: PubMed Central journal article supplement (PMC4050407; doi:10.1186/1476-4598-13-123), 2014-05-24
Supplement: 1476-4598-13-123-S14.pdf [file 1476-4598-13-123-S14.pdf]

**Additional File 14: Probes used in SEQUENOM MassARRAY® EpiTYPER® validation analysis of *DLEU2/Alt1* HM450 promoter probes located on Chromosome 13**

| <b>HM450 Probe</b> | <b>Probe Location</b>   | <b>Validation Left Primer</b> | <b>Validation Right Primer</b> |
|--------------------|-------------------------|-------------------------------|--------------------------------|
| CG05394800         | chr13:50707051-50707051 | TTTGTTTATGAAAATTTGGGGTATT     | CACCAAAAACCTTACAAACCACTAAAA    |
| CG20529344         | chr13:50707428-50707428 | GGAGTTGTTTAGAAAAGATGGGTTT     | AAAACCTTAAAATTATTCCCTAACC      |
| CG12883980         | chr13:50707587-50707587 | GGGATATTAGAGGATTTAGGGAGT      | AATCTTAAAATAAACCCCAACCT        |
