# Supplementary material for: Hypermethylation and down-regulation of DLEU2 in paediatric acute myeloid leukaemia independent of embedded tumour suppressor miR-15a/16-1
Source: PubMed Central journal article supplement (PMC4050407; doi:10.1186/1476-4598-13-123), 2014-05-24
Supplement: 1476-4598-13-123-S16.pdf [file 1476-4598-13-123-S16.pdf]

**Additional File 16: TaqMan® gene expression assays utilized**

| <b>Gene</b> | <b>Species</b> | <b>Location</b>            | <b>RefSeq ID</b>                                  | <b>Exon Boundry</b> | <b>Assay Location</b>   | <b>Assay ID</b> |
|-------------|----------------|----------------------------|---------------------------------------------------|---------------------|-------------------------|-----------------|
| DLEU1       | Human          | Chr. 13: 50656414-50679433 | NR_002605.1                                       | 2                   | 445                     | Hs00705554_s1   |
| DLEU2       | Human          | Chr. 13: 50556688-50699677 | NR_002612.1                                       | 6-7                 | 811                     | Hs00863925_m1   |
| TRIM13      | Human          | Chr. 13: 50571143-50592603 | NM_001007278.<br>1/005798.3/0528<br>11.2/213590.1 | 4/3/2               | 5140/4941/5026/5<br>476 | H200328634_s1   |
